## RESEARCH ARTICLE

# Quantitative ethnobotany of plants used for vernacular building construction in Ghana

Maxwell Kwame Boakye \*

Department of Environmental Science, Ho Technical University, Ho, Ghana

\* [mboakye@htu.edu.gh](mailto:mboakye@htu.edu.gh)

## Abstract

Vernacular construction uses locally available materials, including plant-based materials. The sustainability of plant use raises concerns. Social evaluation using an ethnobotanical approach gives a clear overview of the sustainability of wild plant harvesting as it incorporates the views of resource users. In Ghana, plant-based materials are commonly used for vernacular housing construction, especially in rural areas. However, the cultural significance of plant species used for vernacular building construction remains unexplored. This study aimed to take an inventory of plant species and use their ethnobotanical indices to evaluate the sustainability of utilization in vernacular building construction. Ethnobotanical data on plant species used for vernacular building construction was collected from 258 respondents in the Adaklu district of the Volta region. Quantitative ethnobotanical analysis revealed that of the 26 plant species identified to be used for vernacular building construction, *Bambusa vulgaris*, *Borassus aethiopum*, *Elaeis guineensis*, *Senna siamea*, and *Azadirachta indica* were the most culturally significant and valuable. *Bambusa vulgaris* had the highest cultural importance, value, and relative importance index. *Elaeis guineensis* had the highest relative frequency of citations. The findings reveal a high potential for valorizing the culturally important and valuable plant species in the local construction industry. Promoting culturally significant and valuable plant species commercialization presents an opportunity for poverty alleviation at the local level, as most of the species are abundant in the natural environment and are among the commonly planted species for the afforestation program in Ghana.

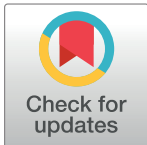

## OPEN ACCESS

**Citation:** Boakye MK (2024) Quantitative ethnobotany of plants used for vernacular building construction in Ghana. PLoS ONE 19(11): e0313778. <https://doi.org/10.1371/journal.pone.0313778>

**Editor:** Gustav Komlaga, Kwame Nkrumah University of Science and Technology Faculty of Pharmacy and Pharmaceutical Sciences, GHANA

**Received:** April 16, 2024

**Accepted:** October 30, 2024

**Published:** November 15, 2024

**Copyright:** © 2024 Maxwell Kwame Boakye. This is an open access article distributed under the terms of the [Creative Commons Attribution License](https://creativecommons.org/licenses/by/4.0/), which permits unrestricted use, distribution, and reproduction in any medium, provided the original author and source are credited.

**Data Availability Statement:** All raw data required to replicate the results of this study are within the manuscript and its [Supporting Information](#) files.

**Funding:** The author(s) received no specific funding for this work.

**Competing interests:** The authors have declared that no competing interests exist.

## Introduction

Vernacular construction provides the needed shelter with traditional construction techniques for people to build their houses using locally available materials [1–4]. A vernacular architecture consisting of mud houses, wattle and daub, and mud-block construction with a thatched roof remains the most common housing type throughout rural Africa [5, 6]. Natural resource exploitation is a major source of material, fuel, and medical supplies for rural African communities with limited access to modern services and goods [7, 8]. The reliance on natural resources for materials, including those used for building, facilitates the high prevalence of vernacular architecture.

Plant-based building materials constitute a prominent and indispensable component of a vernacular building [1–4, 9]. The dependence on plant-based materials for vernacular construction raises the issue of the sustainability of their extraction and utilization for building materials. The availability of species, their regeneration potential, and the rate of use of the species have been the scientific focus of sustainable utilization of plants in building construction [4, 9, 10]. However, most resources are used by local people, which, in turn, requires an understanding of their perspective on resource sustainability. Social evaluation using an ethnobotanical approach gives a clear overview of the sustainability of wild plant harvesting from a social evaluation perspective [3, 4, 11].

The ethnobotanical approach identifies and evaluates the plant species that are most important to a given local community's culture [12–15]. The relative ethnobotanical importance of plants is pertinent to conservation biology as it may indicate the species that may be subjected to the most significant harvesting pressure [12, 14, 16]. Identifying the relative importance of plant species for vernacular building construction may be vital to the social evaluation of sustainability. Quantitative ethnobotanical analysis can assist in identifying plant species under pressure from cultural utilization and requiring mitigation measures. Knowledge of the most culturally valuable plant species can serve as a basis for promoting sustainable utilization and initiating conservation management measures for species under pressure in local communities.

In Ghana, plant-based materials are exploited for vernacular building purposes [1]. However, studies focusing on the ethnobotanical description and their quantitative approach to the plant species used for vernacular building construction valuable to the local communities are lacking. Raw material consumption for construction purposes is one of the most severe impacts of construction-related activities on the environment in Ghana [17, 18]. Information on the preferences of plant species for vernacular building purposes among local communities is vital to knowing about the sustainability of utilization and devising a conservation management strategy. This study aimed to take inventory of the plant species used for vernacular buildings and determine their ethnobotanical importance in the Adaklu district of Ghana. The study objectives are to determine the (a) cultural importance and value of the plant species used to construct vernacular buildings, (b) consensus on the use of plant species in building elements, and (c) conservation implications of plant species used in vernacular building construction. Knowledge about the culturally essential plant species is necessary to develop management strategies to ensure the long-term sustainability of the plant species used.

## Materials and methods

### Study area

The study was undertaken in the Adaklu District of the Volta Region of Ghana, which is located at longitudes 06°41'1"N and 6.68361°N and latitudes 00°20'1"E and 0.33361°E. The study area shares boundaries with Ho Municipal to the North, Central Tongu District to the South, Agotime-Ziope District to the East and the West with Ho West District [19]. There are 38,649 people living in the Adaklu District, which is entirely rural, lacks an urban area, and covers a total land area of 810 km<sup>2</sup> [20]. Most of its residents depend on the natural resources in the area for their livelihood and employment. Extracting poles, beams, and laths for constructing vernacular buildings is a common form of natural resource utilization. Among the materials used to construct the outer walls in the district, wood ranks third, while palm leaf and raffia ranked second and bamboo third as the primary materials used for roofing [19]. The prevalent use of plant-based material for vernacular building construction is anticipated to result in high knowledge of valuable species.

## Ethnobotanical survey

A purposeful and snowball sampling approaches were used to select participants in this study. Participants were chosen based on their familiarity with the study's topic and their ability to recommend other members of the targeted population [21]. All participants selected were to have been involved in vernacular building construction before or currently. These approaches ensured that the chosen participants were representative of artisans in the vernacular building sector and could provide information pertinent to this study. Based on these two sampling approaches, 311 participants were identified to be actively involved or have been active participants in vernacular building constructions and, therefore, potential candidates for this study. Of these, 258 consented to take part in the study after being informed of their freedom to decline participation at will through an informed oral consent procedure.

Ethnobotanical data on plant-based materials used for vernacular building construction were collected through semi-structured interviews in April and May 2023. The questionnaire focused on the plant species used to construct the main elements of a vernacular building in Ghana, i.e., main poles, main beams, roof laths, wall laths, binding material, and thatching material. The respondents were asked to provide a list of the plant species used for the main beams, which form the primary support structure of the roof; main posts, which support the walls and roof; wall laths, which are sticks woven between two main posts to form the wall structure and may be plastered; binding/tying material, which is used to fasten wall and roof laths; and thatching material, which is used for roofing. The respondents were encouraged and prompted for information using prompts and probing. The interviews were conducted in Ewe, the most widely spoken language in the district, and adopted as a lingua franca for many respondents who could not speak the English language. All the research assistants were fluent in the English and Ewe languages.

The local names mentioned by the respondents were matched with those in the available literature for plant species identification [22–24] and plants identified in the local area [25]. Plant material was collected and used to confirm their identification by comparison with voucher specimens by the curators at the Institute of Traditional and Alternative Medicine, University of Health and Allied Sciences (UHAS). Plants of the World Online (<https://powo.science.kew.org>) electronic databases was used to establish the names and authority of plant species.

**Ethics statement.** This study was approved by the Ho Technical University ethics committee (Reference HTU/EC 2023–024). The participants gave their oral informed consent before the interview.

**Data analysis.** The analysis of ethnobotanical data was carried out using the "ethnobotany" R package developed by Whitney [26]. Several indices were determined to assess the ethnobotanical significance of different plant species, including the Use Report (UR), Cultural Importance (CI), Frequency of Citation (FC), Number of Uses (NU), Relative Frequency of Citation (RFC), Relative Importance Index (RI), Cultural Value of Ethnospecies (CVe), and Fidelity Level (FL). UR values for each plant species were calculated by counting the number of informants who mentioned each use category for the species and summing up all the uses in each category [27]. The Cultural Importance (CI) index was used to calculate the cultural significance of each plant species in the dataset [12]. The Number of Uses (NU) per plant species was calculated by adding up all the different uses of a species, while the Frequency of Citation (FC) per species was calculated by summing up the number of informants who cited a use for that plant species in the dataset [27]. The Relative Frequency of Citation (RFC) index determined the importance of each plant species based on the number of informants who reported using it, while the Relative Importance (RI) index calculated the relative importance of each

species in the dataset, taking into account only the use categories [12]. A species' cultural, practical, and economic importance were determined using the Cultural Value (CVe) index [15]. Finally, the Fidelity Level (FL) index calculated the percentage of informants who used a plant for the same purpose compared to all the uses of that plant [28]. All these indices were used to assess the ethnobotanical significance of different plant species used for vernacular building. The data file used for the analysis is available in the [S1 Table](#).

**Informant agreement ratio.** The informant agreement ratio (IAR) was used to measure the consensus level among the vernacular building artisans for plant species used for a specific building element. The original formula proposed by Trotter and Logan [29] was interpreted as follows:

$$IAR = \frac{Nur - Ns}{Nur - 1} \quad (1)$$

where Nur = is the total number of use reports (UR) recorded for a given building element, and Ns = is the total number of plant species utilized for the particular building element. The IAR varies between 0 (where there is no consensus or agreement on the number of plant species used for the building element) and 1 (there is consensus on the number of plant species used for the building element).

## Results

A total of 26 plant species were documented to be used for the various construction elements of vernacular buildings ([Table 1](#)).

Of the 26 species identified, the family Arecaceae (n = 6) was the most represented, followed by the Fabaceae (n = 4), Apocynaceae and Poaceae (n = 2; each) while the remaining 12 families were represented by a single plant species (n = 1; each). Ethnobotanical indices of the 26 species used by respondents in this study revealed the highest use report (UR) and cultural importance (CI) index for *Bambusa vulgaris* (n = 440, 1.705), followed by *Borassus aethiopum* (n = 406, 1.574), *Elaeis guineensis* (n = 397, 1.539), *Senna siamea* (n = 288, 1.116), *Azadirachta indica* (n = 265, 1.027), *Funtumia africana* (n = 199, 0.771), *Rhipsalis baccifera* (n = 187, 0.725), and *Raphia palma-pinus* (n = 175, 0.678) ([Table 1](#)). The number of uses (NU) for each plant species for the different building elements was found to be highest for *B. vulgaris* (n = 4), *S. siamea* and *A. indica* (n = 3; each), *B. aethiopum*, *E. guineensis*, *F. africana* (n = 2; each), while the remaining 20 species recorded a single NU (n = 1; each). The highest FC was recorded for *E. guineensis*, (n = 251), followed by *B. aethiopum* (n = 211), *R. baccifera* (n = 187), and *R. palma-pinus* (n = 175).

*E. guineensis* had the highest RFC value (0.973), followed by *B. aethiopum* (0.818), *R. baccifera* (0.725), and *R. palma-pinus* (0.678). The highest value for the relative importance index (RI) was recorded for *B. vulgaris* (0.823), an indication that it was the most frequently mentioned as useful and in the maximum number of uses (NU), followed by *E. guineensis* (0.750), *B. aethiopum* (0.670), *S. siamea* (0.588), *A. indica* (0.580), *F. africana* (0.525), *R. baccifera* (0.498) and *R. palma-pinus* (0.474). The cultural value index revealed that *B. vulgaris* was the most culturally valued with (CVe) value (0.714), followed by *E. guineensis* (0.499), *B. aethiopum* (0.429), *S. siamea* (0.231), and *A. indica* (0.205) ([Table 1](#)).

The agreement ratios among the respondents for the utilization of plant species for vernacular building elements were high ([Table 2](#)). The highest IAR was recorded for the wall lath (0.997) with only two plant species applied for this building element. Roof lath and binding material had the second highest IAR (0.994; each) followed by main beam (0.993), main pole and thatch material (0.991; each). The main poles construction element had the highest

Table 1. Ethnobotanical indices of plants used for vernacular building in Ghana.

| Family         | Scientific name                                              | Local name       | Voucher ID           | Conservation status | URs | CI    | FCs | NUs | RFCs  | RI    | CVe   |
|----------------|--------------------------------------------------------------|------------------|----------------------|---------------------|-----|-------|-----|-----|-------|-------|-------|
| Poaceae        | <i>Bambusa vulgaris</i> Schrad. ex J.C.Wendl.                | Pamploti         | UHAS/ITAM/2023/L029  | LC                  | 440 | 1.705 | 162 | 4   | 0.628 | 0.823 | 0.714 |
| Arecaceae      | <i>Borassus aethiopicum</i> Mart.                            | Agorti           | UHAS/ITAM/2023/L030  | LC                  | 406 | 1.574 | 211 | 2   | 0.818 | 0.670 | 0.429 |
| Arecaceae      | <i>Elaeis guineensis</i> Jacq.                               | Deti             | UHAS/ITAM/2023/L001  | LC                  | 397 | 1.539 | 251 | 2   | 0.973 | 0.750 | 0.499 |
| Fabaceae       | <i>Senna siamea</i> (Lam.) H.S.Irwin & Barneby               | Zangarati        | UHAS/ITAM/2023/L028  | LC                  | 288 | 1.116 | 107 | 3   | 0.415 | 0.588 | 0.231 |
| Meliaceae      | <i>Azadirachta indica</i> A.Juss.                            | Liliti           | UHAS/ITAM/2023/L003  | LC                  | 265 | 1.027 | 103 | 3   | 0.399 | 0.580 | 0.205 |
| Apocynaceae    | <i>Funtumia africana</i> (Benth.) Stapf                      | Kpomi            | UHAS/ITAM/2024/SB001 | LC                  | 199 | 0.771 | 138 | 2   | 0.535 | 0.525 | 0.138 |
| Cactaceae      | <i>Rhipsalis baccifera</i> (J.S.Muell) Stearn                | Adzorka          | UHAS/ITAM/2024/L001  | LC                  | 187 | 0.725 | 187 | 1   | 0.725 | 0.498 | 0.088 |
| Arecaceae      | <i>Raphia palma-pinus</i> (Gaertn.) Hutch.                   | Ebe              | UHAS/ITAM/2024/L002  | NT                  | 175 | 0.678 | 175 | 1   | 0.678 | 0.474 | 0.077 |
| Moraceae       | <i>Antiaris toxicaria</i> (J.F.Gmel.) Lesch.                 | Logo             | UHAS/ITAM/2024/SB002 | LC                  | 163 | 0.632 | 163 | 1   | 0.632 | 0.450 | 0.067 |
| Phyllanthaceae | <i>Bridelia ferruginea</i> Benth.                            | Akamiti          | UHAS/ITAM/2023/SB001 | LC                  | 137 | 0.531 | 137 | 1   | 0.531 | 0.398 | 0.047 |
| Fabaceae       | <i>Baphia nitida</i> G.Lodd.                                 | Toti             | UHAS/ITAM/2024/L003  | LC                  | 130 | 0.504 | 130 | 1   | 0.504 | 0.384 | 0.042 |
| Apocynaceae    | <i>Cryptolepis nigrescens</i> (Wennberg) L. Joubert & Bruyns | Globo            | UHAS/ITAM/2024/L008  | NE                  | 127 | 0.492 | 127 | 1   | 0.492 | 0.378 | 0.040 |
| Poaceae        | <i>Andropogon gayanus</i> Kunth                              | -                | UHAS/ITAM/2024/L009  | NE                  | 124 | 0.481 | 124 | 1   | 0.481 | 0.372 | 0.038 |
| Musaceae       | <i>Musa × sapientum</i> L.                                   | Toworka          | UHAS/ITAM/2023/L009  | LC                  | 121 | 0.469 | 121 | 1   | 0.469 | 0.366 | 0.037 |
| Combretaceae   | <i>Anogeissus leiocarpa</i> (DC.) Guill. & Perr.             | Hehe/Hihe        | UHAS/ITAM/2024/L004  | LC                  | 110 | 0.426 | 110 | 1   | 0.426 | 0.344 | 0.030 |
| Rubiaceae      | <i>Gardenia ternifolia</i> Schumach. & Thonn.                | Efeti            | UHAS/ITAM/2024/L005  | LC                  | 101 | 0.391 | 101 | 1   | 0.391 | 0.326 | 0.026 |
| Fabaceae       | <i>Leucaena leucocephala</i> (Lam.) de Wit                   | Klikagbe         | UHAS/ITAM/2024/L006  | NE                  | 91  | 0.353 | 91  | 1   | 0.353 | 0.306 | 0.021 |
| Arecaceae      | <i>Eremospatha macrocarpa</i> Schaedtler                     | Mfia/cane        | UHAS/ITAM/2024/L007  | LC                  | 83  | 0.322 | 83  | 1   | 0.322 | 0.290 | 0.017 |
| Acanthaceae    | <i>Avicennia germinans</i> (L.) L.                           | Amuti/<br>Amutsi | UHAS/ITAM/2024/L010  | LC                  | 81  | 0.314 | 81  | 1   | 0.314 | 0.286 | 0.016 |
| Cyperaceae     | <i>Cyperus papyrus</i> L.                                    | Keti             | UHAS/ITAM/2024/AP001 | LC                  | 79  | 0.306 | 79  | 1   | 0.306 | 0.282 | 0.016 |
| Lamiaceae      | <i>Tectona grandis</i> L.f.                                  | Teak             | UHAS/ITAM/2024/L011  | EN                  | 74  | 0.287 | 74  | 1   | 0.287 | 0.272 | 0.014 |
| Arecaceae      | <i>Cocos nucifera</i> L.                                     | Neti             | UHAS/ITAM/2021/FR008 | NE                  | 73  | 0.283 | 73  | 1   | 0.283 | 0.270 | 0.013 |
| Fabaceae       | <i>Tamarindus indica</i> L.                                  | Eforti           | UHAS/ITAM/2024/FR001 | LC                  | 68  | 0.264 | 68  | 1   | 0.264 | 0.260 | 0.012 |
| Ebenaceae      | <i>Diospyros mespiliformis</i> Hochst. ex A.DC.              | Keyi/Keke        | UHAS/ITAM/2024/L012  | LC                  | 67  | 0.260 | 67  | 1   | 0.260 | 0.258 | 0.011 |
| Arecaceae      | <i>Raphia hookeri</i> G. Mann & H. Wendl.                    | Alati            | UHAS/ITAM/2024/L013  | LC                  | 62  | 0.240 | 62  | 1   | 0.240 | 0.249 | 0.010 |

(Continued)

Table 1. (Continued)

| Family    | Scientific name                | Local name | Voucher ID          | Conservation status | URs | CI    | FCs | NUs | RFCs  | RI    | CVe   |
|-----------|--------------------------------|------------|---------------------|---------------------|-----|-------|-----|-----|-------|-------|-------|
| Typhaceae | <i>Typha domingensis</i> Pers. | Ava        | UHAS/ITAM/2024/L014 | LC                  | 61  | 0.236 | 61  | 1   | 0.236 | 0.247 | 0.009 |

UR = use report, CI = cultural importance, FC = frequency of citation, NU = number of uses, RFC = relative frequency of citation, RI = relative importance, CVe = cultural value

NE = not evaluated, LC = least concern, NT = Near Threatened, EN = endangered

<https://doi.org/10.1371/journal.pone.0313778.t001>

number of plant species (n = 12) followed by thatch material (n = 8), main beam (n = 6), roof laths and binding material (n = 4; each) and wall lath (n = 2). The S2 Table contains the IAR analysis of each plant species used to construct vernacular buildings.

The specific valuable purposes determined by the fidelity level (FL) of the 26 plant species for vernacular building construction elements are presented in Table 3. Based on the FL, *B. vulgaris* was used purposefully for roof lath, while *E. guineensis* was for wall lath, and *B. aethiopum*, *F. africana*, and *S. siamea* were for the main beam. *A. indica*, *B. ferruginea*, *D. mespiliformis*, *K. senegalensis*, *G. ternifolia*, *A. leiocarpa*, *T. indica*, *T. grandis*, and *B. ferruginea* were most useful for main poles. Pictures of the application of plant species for elements of vernacular buildings are provided in S1 File.

## Discussion

Plant-based building materials are essential elements of vernacular buildings [9]. Nonetheless, not all plant species are considered valuable in vernacular construction by the local communities. Culturally important species typically have more than an average number of citations [30]. The high citations (use report) for *B. vulgaris*, *B. aethiopum*, *E. guineensis*, *S. siamea*, *A. indica*, and *F. africana* qualifies them as culturally significant species for vernacular building construction. Also, a UV of more than 1 indicates that the resource is highly valued in local communities and has a unique cultural significance [7, 31]. Thus, these plant species with a UV index exceeding 1 were highly valued as a source of plant-based material for vernacular buildings by construction artisans in local communities.

Bamboo, which was identified as the most highly valued and culturally important plant species for vernacular building construction, was consistently mentioned in other studies as applicable in vernacular building construction in Ghana [1, 32–34] and other places [2, 35, 36] although these studies did not calculate their use and cultural values. Agyekum et al. [1] found bamboo to be Ghana's second most important vernacular building material after timber. The versatility of bamboo in construction elements in this study corroborates other studies that

Table 2. Number of use reports, number of species used, and informant agreement ratio (IAR) of plant species for the construction of particular vernacular building element in Ghana.

| Building element | Nur  | Ns | Nur-Ns | Nur-1 | IAR   |
|------------------|------|----|--------|-------|-------|
| Main pole        | 1183 | 12 | 1171   | 1182  | 0.991 |
| Main beam        | 730  | 6  | 724    | 729   | 0.993 |
| Wall laths       | 339  | 2  | 337    | 338   | 0.997 |
| Roof lath        | 539  | 4  | 535    | 538   | 0.994 |
| Binding material | 518  | 4  | 514    | 517   | 0.994 |
| Thatch material  | 800  | 8  | 792    | 799   | 0.991 |

<https://doi.org/10.1371/journal.pone.0313778.t002>



Table 3. Fidelity level (FL) of plant species used for vernacular building construction in Ghana.

| Building element        | Plants species used            | FL (%) |
|-------------------------|--------------------------------|--------|
| Main poles              | <i>Azadirachta indica</i>      | 100.00 |
|                         | <i>Anogeissus leiocarpa</i>    | 100.00 |
|                         | <i>Avicennia germinans</i>     | 100.00 |
|                         | <i>Baphia nitida</i>           | 100.00 |
|                         | <i>Gardenia ternifolia</i>     | 100.00 |
|                         | <i>Diospyros mespiliformis</i> | 100.00 |
|                         | <i>Tamarindus indica</i>       | 100.00 |
|                         | <i>Tectona grandis</i>         | 100.00 |
|                         | <i>Bridelia ferruginea</i>     | 100.00 |
|                         | <i>Antiaris toxicaria</i>      | 100.00 |
|                         | <i>Senna siamea</i>            | 82.24  |
|                         | <i>Funtumia africana</i>       | 44.20  |
| Main beam               | <i>Borassus aethiopum</i>      | 100.00 |
|                         | <i>Funtumia africana</i>       | 100.00 |
|                         | <i>Leucaena leucocephala</i>   | 100.00 |
|                         | <i>Senna siamea</i>            | 100.00 |
|                         | <i>Azadirachta indica</i>      | 70.87  |
|                         | <i>Bambusa vulgaris</i>        | 67.90  |
| Wall lath               | <i>Elaeis guineensis</i>       | 100.00 |
|                         | <i>Bambusa vulgaris</i>        | 54.32  |
| Roof lath               | <i>Bambusa vulgaris</i>        | 100.00 |
|                         | <i>Borassus aethiopum</i>      | 92.42  |
|                         | <i>Senna siamea</i>            | 86.92  |
| Building rope           | <i>Azadirachta indica</i>      | 86.41  |
|                         | <i>Musa × sapientum</i>        | 100.00 |
|                         | <i>Cryptolepis nigrescens</i>  | 100.00 |
|                         | <i>Rhipsalis baccifera</i>     | 100.00 |
| Thatch material         | <i>Eremospatha macrocarpa</i>  | 100.00 |
|                         | <i>Raphia hookeri</i>          | 100.00 |
|                         | <i>Raphia palma-pinus</i>      | 100.00 |
|                         | <i>Cyperus papyrus</i>         | 100.00 |
|                         | <i>Cocos nucifera</i>          | 100.00 |
|                         | <i>Typha domingensis</i>       | 100.00 |
|                         | <i>Andropogon gayanus</i>      | 100.00 |
|                         | <i>Elaeis guineensis</i>       | 58.17  |
| <i>Bambusa vulgaris</i> | 49.38                          |        |

<https://doi.org/10.1371/journal.pone.0313778.t003>

found it to be applied in various aspects of vernacular buildings [2, 35–37]. The high cultural importance of *B. aethiopum* for construction in this study is corroborated by other studies [38, 39] that also found it to be suitable for construction purposes.

The informant agreement ratio serves as a measure of the uniformity of ethnobotanical data [40]. The high IAR of plant species for vernacular building elements suggest that they have become essential to local cultural knowledge due to their effectiveness in vernacular housing construction. For instance, *A. leiocarpa*, *A. germinans*, *B. nitida*, *G. ternifolia*, *D. mespiliformis*, *T. indica*, *T. grandis*, *B. ferruginea*, and *A. toxicaria* were exclusively used for main poles, while *L. leucocephala* was used for the main beam only by all the respondents who mentioned these plant species. Likewise, all the respondents used *M. sapientum*, *C. nigrescens*, *R. baccifera*,

and *E. macrocarpa* for fastening. At the same time, the respondents applied *R. hookeri*, *R. palma-pinus*, *C. papyrus*, *C. nucifera*, *T. domingensis*, and *A. gayanus* for thatching purposes only. According to Heinrich et al. [30], the selection and application of resources for traditional purposes are typically determined by how effective they are seen to be in the culture. The high IAR for the plant species for specific vernacular building elements indicates that they have not fallen into disuse from cultural adaptation and are not perceived as ineffective for the purposes they are applied.

The Fidelity Level (FL) is useful for identifying the most preferred plant species used by vernacular building artisans to construct some aspects of the building. The purposes and species' preferences for the construction elements identified in this study were consistent with their recorded application in other studies. Using bamboo for the main beam, wall, roof laths, and thatching material is well documented in other studies [2, 35–37]. Also, the use of *A. indica*, *B. nitida*, and *S. siamea* for house posts and rafters for vernacular houses is corroborated by previous studies [41–43]. The use of oil palm fronds and petiole for vernacular building elements in this study has been mentioned in previous studies [44–46]. The utilization of *T. domingensis*, *A. gayanus* and *C. papyrus* for thatch roof purposes is consistent with their documented application in other places [47–49]. *C. nigrescens* utilization for fastening purposes has been documented in Nigeria where the stem was used as a rope for tying domestic animals and firewood [50, 51]. However, the use of *R. baccifera* for tethering has yet to be reported in any previous study, which can be considered idiosyncratic to the study area. Peculiarities in ethnobotanical knowledge and applications in utilization have been identified in the study region relative to other areas of the country [7, 52].

## Conservation implications and valorization in sustainable construction

Rural communities with limited access to modern services and commodities rely heavily on exploiting natural resources for material purposes [7, 8]. Therefore, regardless of the rarity or conservation status of the resource or species, their use may persist, especially for species that have a high cultural importance. The harvest of culturally significant species for vernacular buildings in this study can be considered sustainable based on their conservation status. All the highly valued and culturally important species: *B. vulgaris*, *B. aethiopum*, *E. guineensis*, *S. siamea*, and *A. indica* are classified as Least Concern (LC) under the International Union for Conservation of Nature (IUCN) Red List Threatened Species [53], which have a lower risk of extinction.

Cultivated or domesticated plants that depend on humans for reproduction as well as species not harvested from vulnerable vegetation types and protected areas are less susceptible to overharvesting [11]. The culturally significant plant species in this study have been identified among the common plant species in the landscape [54]. Bamboo grows and matures faster than several other plant species widely distributed in Ghana, making their harvesting more sustainable for building construction [33, 34]. Oil palm plants are obtainable all year round and in considerable quantity, thus ensuring their abundance and availability [55]. *S. siamea* is one of Ghana's most commonly planted species for afforestation [54]. The Neem tree is among Ghana's most widely planted exotic plant species [54, 56]. The highly valued and culturally significant plant species in this study have the attributes of being abundant and widely distributed, with high reproductive and growth rates, cultivated to ensure that their harvest can be sustainably managed.

The sustainable valorization of resources is contingent upon the availability of species and their socio-economic value. The socio-economic value (i.e., ethnobotanical, economic, and



nutritional values) and the species availability (i.e., their national distribution and threat status) form the basis for assigning valorization priority and plan, respectively [57]. All the highly valued and culturally significant species in this study have socio-economic value and species availability attributes for commercialization in Ghana. The valorization of highly valued and culturally important species can be an important resource for alleviating poverty in local communities. The study recommends exploring the culturally important plant species in green buildings in Ghana. Bamboo is established as a sustainable material for building construction [35, 37]. *B. aethiopum*'s potential for construction and its structural usefulness has been established [58]. Wahab et al. [55] identified the usefulness of oil palm fronds for board production as an alternative to timber wood. The environmental benefits and structural potentials of Neem trees for construction purposes have been studied [42, 56]. In the Ghanaian context, the importance of vernacular building materials for green construction is acknowledged [1, 32]. What is needed is the promotion of their adoption into the local building industry.

## Conclusion

Using a quantitative ethnobotanical approach, this study has established the plant species of high cultural significance for vernacular building construction elements in Ghana. The quantitative approach revealed the plant species' actual cultural significance and value to local communities that previously had remained undetected. The study has established that bamboo is the most culturally significant and valuable species for vernacular building construction. The study found a high potential for valorization of the plant species with high cultural importance and value that the local government can promote for poverty alleviation. The culturally significant and valued species: *B. vulgaris*, *B. aethiopum*, *E. guineensis*, *S. siamea*, and *A. indica* for vernacular building construction are classified by the IUCN as Least Concern (LC), which have a lower risk of extinction. The study recommends vernacular building plant materials adoption for green construction in the formal construction industry and enhancement in the promotion of their valorization.

## Supporting information

**S1 Table. Data file used for analysis.**

(XLSX)

**S2 Table. Informant agreement ratio (IAR) analysis.**

(XLSX)

**S1 File. Pictures of vernacular building elements.**

(PDF)

## Acknowledgments

The author is grateful to all the respondents in this study for making the research work possible. The author thanks the research assistants—Henry Afotey, Prince Adzakor, Korlefome Akpini, Johnson Gavor, and Emmanuel Adjin for administering the questionnaire. The author appreciates Alfred Ofori Agyemang of the Institute of Traditional and Alternative Medicine, University of Health and Allied Sciences (UHAS), for assistance with plant identification.

## Author Contributions

**Conceptualization:** Maxwell Kwame Boakye.

**Data curation:** Maxwell Kwame Boakye.

**Formal analysis:** Maxwell Kwame Boakye.

**Investigation:** Maxwell Kwame Boakye.

**Methodology:** Maxwell Kwame Boakye.

**Resources:** Maxwell Kwame Boakye.

**Writing – original draft:** Maxwell Kwame Boakye.

**Writing – review & editing:** Maxwell Kwame Boakye.

## References

1. Agyekum K, Kissi E, Danku JC. Professionals' views of vernacular building materials and techniques for green building delivery in Ghana. *Scientific African*. 2020; 8:e00424.
2. Sen JN. The role of vernacular construction techniques and materials in developing sustainable building and construction in Africa. MSc Thesis. Eastern Mediterranean University (EMU)-Doğu Akdeniz Üniversitesi (DAÜ). 2020. Available from: <http://i-rep.emu.edu.tr:8080/jspui/handle/11129/5452>
3. Ogeron C, Odonne G, Cristinoi A, Engel J, Grenand P, Beauchêne J, et al. Palikur traditional round-wood construction in eastern French Guiana: ethnobotanical and cultural perspectives. *Journal of Ethnobiology and Ethnomedicine*. 2018; 14:1–8.
4. Sujarwo W, Keim AP. Ethnobotanical study of traditional building materials from the island of Bali, Indonesia. *Economic Botany*. 2017; 71:224–40.
5. Little N C, Kalyoncu K. Materials and constructibility: questions of availability, affordability, and appropriateness. 2024. Available from: <https://www.buffalo.edu/globalhealthequity/global-projects/refugeehealthandwellbeing/uganda/architecture-students-explore-housing-solutions-for-refugees-in->
6. von Seidlein L, Wood H, Brittain OS, Tusting L, Bednarz A, Mshamu S, et al. Knowledge gaps in the construction of rural healthy homes: a research agenda for improved low-cost housing in hot-humid Africa. *PLoS Medicine*. 2019; 16(10):e1002909.
7. Boakye MK, Agyemang AO, Gbadegbe RS, Quashie M, Turkson BK, Adanu KK, et al. Ethnobotanical applications of *Spathodea campanulata* P. Beauv. (African tulip tree) in Ghana. *Ethnobotany Research and Applications*. 2023; 25:1–2.
8. Kisangau PD, Kimiti JM, Mburu MW, Snelder DJ. Factors influencing use of multipurpose trees and shrubs in arid and semiarid lands of Kenya. *Rangeland Ecology and Management*. 2021; 74:125–34.
9. Gaugris JY, Van Rooyen MW. Evaluating patterns of wood use for building construction in Maputaland, South Africa. *South African Journal of Wildlife Research*. 2009; 39(1):85–96.
10. Obiri J, Lawes M, Mukolwe M. The dynamics and sustainable use of high-value tree species of the coastal Pondoland forests of the Eastern Cape Province, South Africa *Forest Ecology and Management*. 2002; 166(1–3):131–48.
11. Posthouwer C, Verheijden TM, van Andel TR. A rapid sustainability assessment of wild plant extraction on the Dutch Caribbean Island of St. Eustatius. *Economic Botany*. 2016; 70:320–31.
12. Tardío J, Pardo-de-Santayana M. Cultural importance indices: a comparative analysis based on the useful wild plants of Southern Cantabria (Northern Spain). *Economic Botany*. 2008; 62:24–39.
13. Hoffman B, Gallaher T. Importance indices in ethnobotany. *Ethnobotany Research and Applications*. 2007; 5:201–18.
14. Albuquerque UP, Lucena RF, Monteiro JM, Florentino AT, Almeida CFCBR. Evaluating two quantitative ethnobotanical techniques. *Ethnobotany Research and Applications*. 2006; 4:051–60.
15. Reyes-García V, Huanca T, Vadez V, Leonard W, Wilkie D. Cultural, practical, and economic value of wild plants: a quantitative study in the Bolivian Amazon. *Economic Botany*. 2006; 60(1):62–74.
16. Byg A, Balslev H. Diversity and use of palms in Zahamena, eastern Madagascar. *Biodiversity and Conservation*. 2001; 10:951–70.
17. Boakye MK, Adanu SK. On-site building construction workers perspective on environmental impacts of construction-related activities: a relative importance index (RII) and exploratory factor analysis (EFA) approach. *Sustainable Environment*. 2022; 8(1):2141158.
18. Ametepey SO, Ansa SK. Impacts of construction activities on the environment: the case of Ghana. *Journal of Construction Project Management and Innovation*. 2014; 4(1):934–48.

19. Ghana Statistical Service. Ghana 2021 Population and housing census. General report volume 3A. Population of Regions and Districts Report. 2021. Available from: [https://statsghana.gov.gh/gssmain/fileUpload/pressrelease/2021%20PHC%20General%20Report%20Vol%203A\\_Population%20of%20Regions%20and%20Districts\\_181121.pdf](https://statsghana.gov.gh/gssmain/fileUpload/pressrelease/2021%20PHC%20General%20Report%20Vol%203A_Population%20of%20Regions%20and%20Districts_181121.pdf)
20. Ghana Statistical Service. 2010 Population & housing census. District analytical report: Adaklu District. 2014. Available from: [https://www2.statsghana.gov.gh/docfiles/2010\\_District\\_Report/Volta/ADAKLU.pdf](https://www2.statsghana.gov.gh/docfiles/2010_District_Report/Volta/ADAKLU.pdf)
21. Babbie ER. The practice of social research. Cengage AU; 2020.
22. JSTOR Global Plants. The global plants database. 2024. Available from: <https://about.jstor.org/librarians/primary-sources/global-plants/>
23. Kuagbedzi S. Morphology of plant names in Anlo. MPhil Thesis. University of Cape Coast. 2019. Available from: <https://ir.ucc.edu.gh/xmlui/handle/123456789/4863>
24. Abbiw DK. Useful plants of Ghana: West African uses of wild and cultivated plants. Intermediate Technology; 1990.
25. Dowsett-Lemaire F, Dowsett RJ. Ornithological surveys in Kalakpa Resource Reserve, Ghana (2005, 2008–11), with notes on vegetation and mammals. Dowsett-Lemaire Miscellaneous Report. 2011; 76. Available from: [https://www.africanbirdclub.org/sites/default/files/MiscRep76\(Kalakpa,2011\).pdf](https://www.africanbirdclub.org/sites/default/files/MiscRep76(Kalakpa,2011).pdf)
26. Whitney C. Package 'ethnobotany R' Version 0.1.7. 2020. Available from: [https://figshare.com/articles/code/ethnobotanyR\\_Calculate\\_Quantitative\\_Ethnobotany\\_Indices\\_R\\_Package\\_v\\_0\\_1\\_7\\_/11791830](https://figshare.com/articles/code/ethnobotanyR_Calculate_Quantitative_Ethnobotany_Indices_R_Package_v_0_1_7_/11791830)
27. Prance GT, Baleé W, Boom BM, Carneiro RL. Quantitative ethnobotany and the case for conservation in Ammonia. Conservation Biology. 1987; 1(4):296–310.
28. Friedman J, Yaniv Z, Dafni A, Palewitch D. A preliminary classification of the healing potential of medicinal plants, based on a rational analysis of an ethnopharmacological field survey among Bedouins in the Negev Desert, Israel. Journal of Ethnopharmacology. 1986; 16(2–3):275–87. [https://doi.org/10.1016/0378-8741\(86\)90094-2](https://doi.org/10.1016/0378-8741(86)90094-2) PMID: 3747566
29. Trotter RT, Logan MH. Informant consensus: a new approach for identifying potentially effective medicinal plants. In: Etkin NL, editor. Plants in indigenous medicine and diet. Redgrave Publishing Company; 2019. pp. 91–112.
30. Heinrich M, Edwards S, Moerman DE, Leonti M. Ethnopharmacological field studies: a critical assessment of their conceptual basis and methods. Journal of Ethnopharmacology. 2009; 124(1):1–7. <https://doi.org/10.1016/j.jep.2009.03.043> PMID: 19537298
31. Rossato SC, Leitão-Filho HD, Begossi A. Ethnobotany of Caiçaras of the Atlantic Forest coast (Brazil). Economic Botany. 1999; 1:387–95.
32. Mensah S, Laryea S. Explaining the lower usage rate of indigenous construction materials in Ghanaian public buildings using bounded rationality. Heliyon. 2023; 9(7). <https://doi.org/10.1016/j.heliyon.2023.e17645> PMID: 37539254
33. Appiah-Kubi E, Owusu FW, Tekpetey SL, Essien C. Bamboo for housing in Ghana: challenges and prospects for the future. Journal of Bamboo and Rattan. 2014; 13(3–4):45–54.
34. Tekpetey SL. Bamboo resources in Ghana: Diversity, properties, products and opportunities. 2011. International Tropical Timber Organization.
35. Yadav M, Mathur A. Bamboo as a sustainable material in the construction industry: an overview. Materials Today: Proceedings. 2021; 43:2872–6.
36. Nurdiah EA. The potential of bamboo as building material in organic shaped buildings. Procedia-Social and Behavioral Sciences. 2016; 216:30–8.
37. Raj AD, Agarwal AB. Bamboo as a building material. Journal of Civil Engineering and Environmental Technology. 2014; 1(3):56–61.
38. Zongo O, Tapsoba F, Cisse H, Traore Y, Savadogo A. Modes of use of the palm *Borassus aethiopum* Mart. by the rural populations of Eastern and Central-Eastern Regions from Burkina Faso. International Journal of Current Microbiology and Applied Sciences. 2018; 7(12):62–74.
39. Ayarkwa J. Potential for utilisation of *Borassus aethiopum* (Fan Palm) in construction in Ghana. Wood News. 1997; 6(4):15–18.
40. Heinrich M, Ankli A, Frei B, Weimann C, Sticher O. Medicinal plants in Mexico: healers' consensus and cultural importance. Social science and Medicine. 1998; 47(11):1859–71. [https://doi.org/10.1016/S0277-9536\(98\)00181-6](https://doi.org/10.1016/S0277-9536(98)00181-6) PMID: 9877354
41. Fern K. Useful tropical plants database 2014: *Baphia nitida*. 2022. Available from: <https://tropical.theferns.info/viewtropical.php?id=Baphia+nitida>

42. Babé C, Kidmo DK, Tom A, Mvondo RR, Kola B, Djongyang N. Effect of neem (*Azadirachta indica*) fibers on mechanical, thermal and durability properties of adobe bricks. *Energy Reports*. 2021; 7:686–98.
43. Stoney C. *Azadirachta indica*—Neem, a versatile tree for the tropics and subtropics. 1997. Available from: <https://winrock.org/factnet-a-lasting-impact/fact-sheets/azadirachta-indica-neem-a-versatile-tree-for-the-tropics-and-subtropics/>
44. Kamga SM, Brokamp G, Cosiaux A, Awono A, Fürniss S, Barfod AS, et al. Use and cultural significance of *Raphia* palms. *Economic Botany*. 2020; 74:207–25.
45. Okoli IC. Oil palm tree wastes 2: Industrial and agricultural uses of oil palm fronds. 2020. Available from: <https://researchtropica.com/oil-palm-tree-wastes-2-industrial-and-agricultural-uses-of-oil-palm-fronds/>
46. Umar MZ, Faslih A, Arsyad M, Ikhsan AA, Umar M. The use of nipah leaves (*Nypa fruticans*) as an environmentally friendly roofing material. In: AIP Conference Proceedings 2017 Sep 29. 1887(1). AIP Publishing. <https://doi.org/10.1063/1.5003484>
47. Lim TK. *Typha domingensis*. In: Lim TK, editor. *Edible medicinal and non-medicinal plants*. Springer: Cham; 2016. pp. 114–121. [https://doi.org/10.1007/978-3-319-26065-5\\_5](https://doi.org/10.1007/978-3-319-26065-5_5)
48. Terer T, Muasya AM, Dahdouh-Guebas F, Ndiritu GG, Triest L. Integrating local ecological knowledge and management practices of an isolated semi-arid papyrus swamp (Loboi, Kenya) into a wider conservation framework. *Journal of Environmental Management*. 2012; 93(1):71–84. <https://doi.org/10.1016/j.jenvman.2011.08.005> PMID: 22054573
49. Bassett TJ, Zuéli KB. Environmental discourses and the Ivorian savanna. *Annals of the Association of American Geographers*. 2000; 90(1):67–95.
50. Adase E, Ankutse P, Kumadoh D, Archer MA, Kyene MO, Yeboah GN, et al. A Review of *Parquetina nigrescens* (Afzel.) Bullock, A plant for traditional medicine: phytochemical and pharmacological properties. *Evidence-Based Complementary and Alternative Medicine*. 2022;2022. <https://doi.org/10.1155/2022/6076707> PMID: 36437836
51. Akinsola OA. Radical scavenging activity study of *Parquetina nigrescens* leaves using DPPH (1, 1-Diphenyl-2-Picrylhydrazyl) method. B.Tech Thesis. Federal University of Technology, Akure, Ondo State. 2017. Available from: [https://www.academia.edu/43284482/RADICAL\\_SCAVENGING\\_ACTIVITY\\_STUDY\\_OF\\_PARQUETINA\\_NIGRESCENS\\_LEAVES\\_USING\\_DPPH\\_1\\_1\\_Diphenyl\\_2\\_Picrylhydrazyl\\_METHOD](https://www.academia.edu/43284482/RADICAL_SCAVENGING_ACTIVITY_STUDY_OF_PARQUETINA_NIGRESCENS_LEAVES_USING_DPPH_1_1_Diphenyl_2_Picrylhydrazyl_METHOD)
52. Boakye MK, Agyemang AO, Turkson BK, Wiafe ED, Baidoo MF, Bayor MT. Ethnobotanical inventory and therapeutic applications of plants traded in the Ho Central Market, Ghana. *Ethnobotany Research and Applications*. 2022; 23:1–20.
53. IUCN. The IUCN Red List of Threatened Species. Version 2023–1. 2024. Available from: <https://www.iucnredlist.org>
54. Koku JE. Tree planting, local knowledge and species preference in the South Tongu District of Ghana: some perspectives. *GeoJournal*. 2002; 57:227–39.
55. Wahab R, Rasat MS, Fauzi NM, Sulaiman MS, Samsi HW, Mokhtar N, et al. *Processing and properties of oil palm fronds composite boards from *Elaeis guineensis**. In: Kamyab H, editor. *Elaeis guineensis*. IntechOpen. 2021. pp. 1–32.
56. Quartey GA, Eshun JF, Attitsogbui E. A comparative study into the engineering properties of neem wood from Ghana. *Materials Sciences and Applications*. 2021; 12(11):475–83.
57. Hounsou-Dindin G, Idohou R, Akakpo AD, Adome N, Adomou AC, Assogbadjo AE, et al. Assessment of wild oil plants diversity and prioritization for valorization in Benin (West Africa): a multivariate approach. *Trees, Forests and People*. 2022; 7:100210.
58. Acheampong JB, Effah B, Antwi K, Achana EW. Physical properties of palmyra palm wood for sustainable utilization as a structural material. *Maderas. Ciencia y tecnología*. 2022; 24.
